# Supplementary material for: Semiconductor–noble metal hybrid nanomaterials with controlled structures
Source: Royal Society of Chemistry journal article supplement (doi:10.1039/c2ta00765g), 2012-11-16
Supplement: c2ta00765g.pdf [file c2ta00765g.pdf]

## Supporting Information

### Semiconductor-noble metal hybrid nanomaterials with controlled structures

Dingsheng Wang, Xiaoyang Li, Hao Li, Linsen Li, Xun Hong, Qing Peng\*, and  
Yadong Li

Department of Chemistry, Tsinghua University, Beijing 100084, P. R. China

\*E-mail: pengqing@mail.tsinghua.edu.cn

#### Supplementary Figures

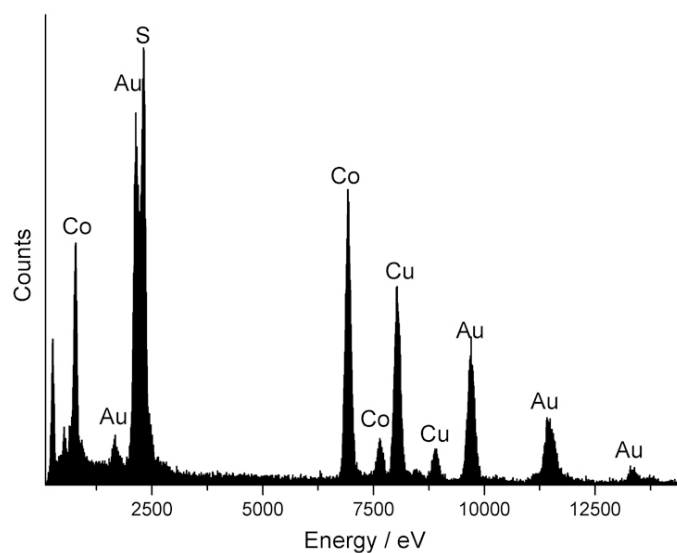

Figure S1. EDS pattern of Co<sub>x</sub>S@Au sample.

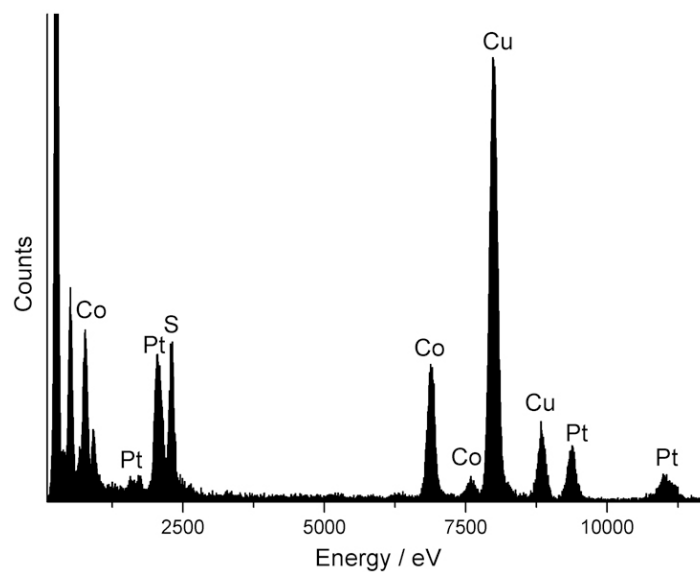

Figure S2. EDS pattern of Co<sub>x</sub>S/Pt sample.

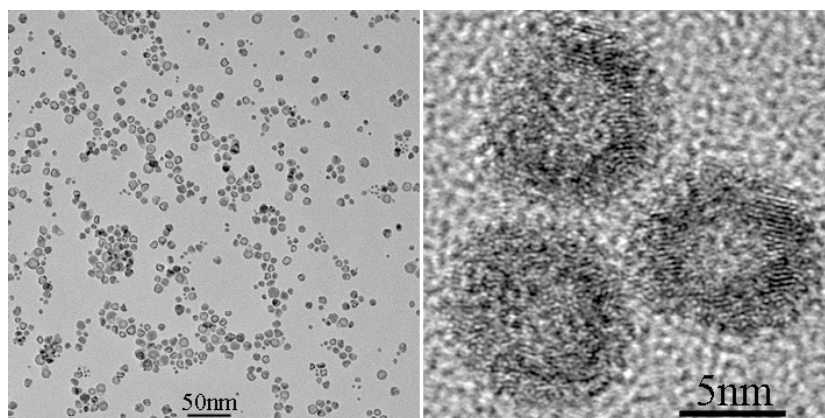

Figure S3. TEM images of Pt@Ag nanoparticles treated with nitric acid.

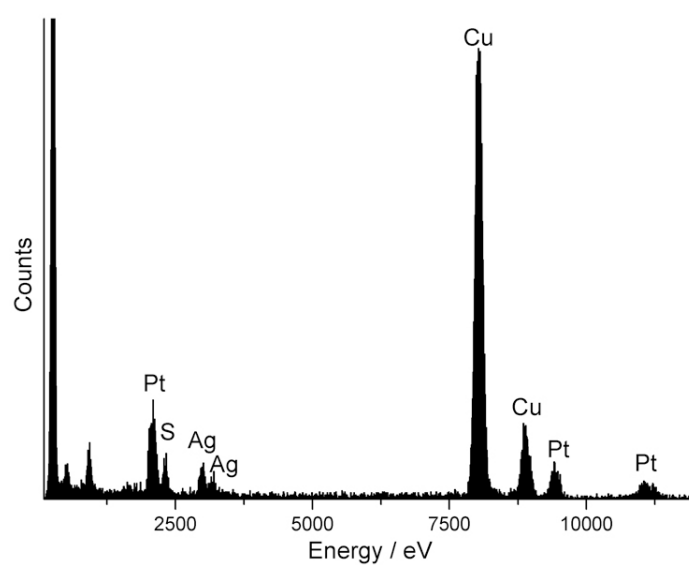

Figure S4. EDS pattern of Pt-Ag<sub>2</sub>S sample.
